# Supplementary material
Source: PubMed Central journal article supplement (PMC2760592)

Figure 5

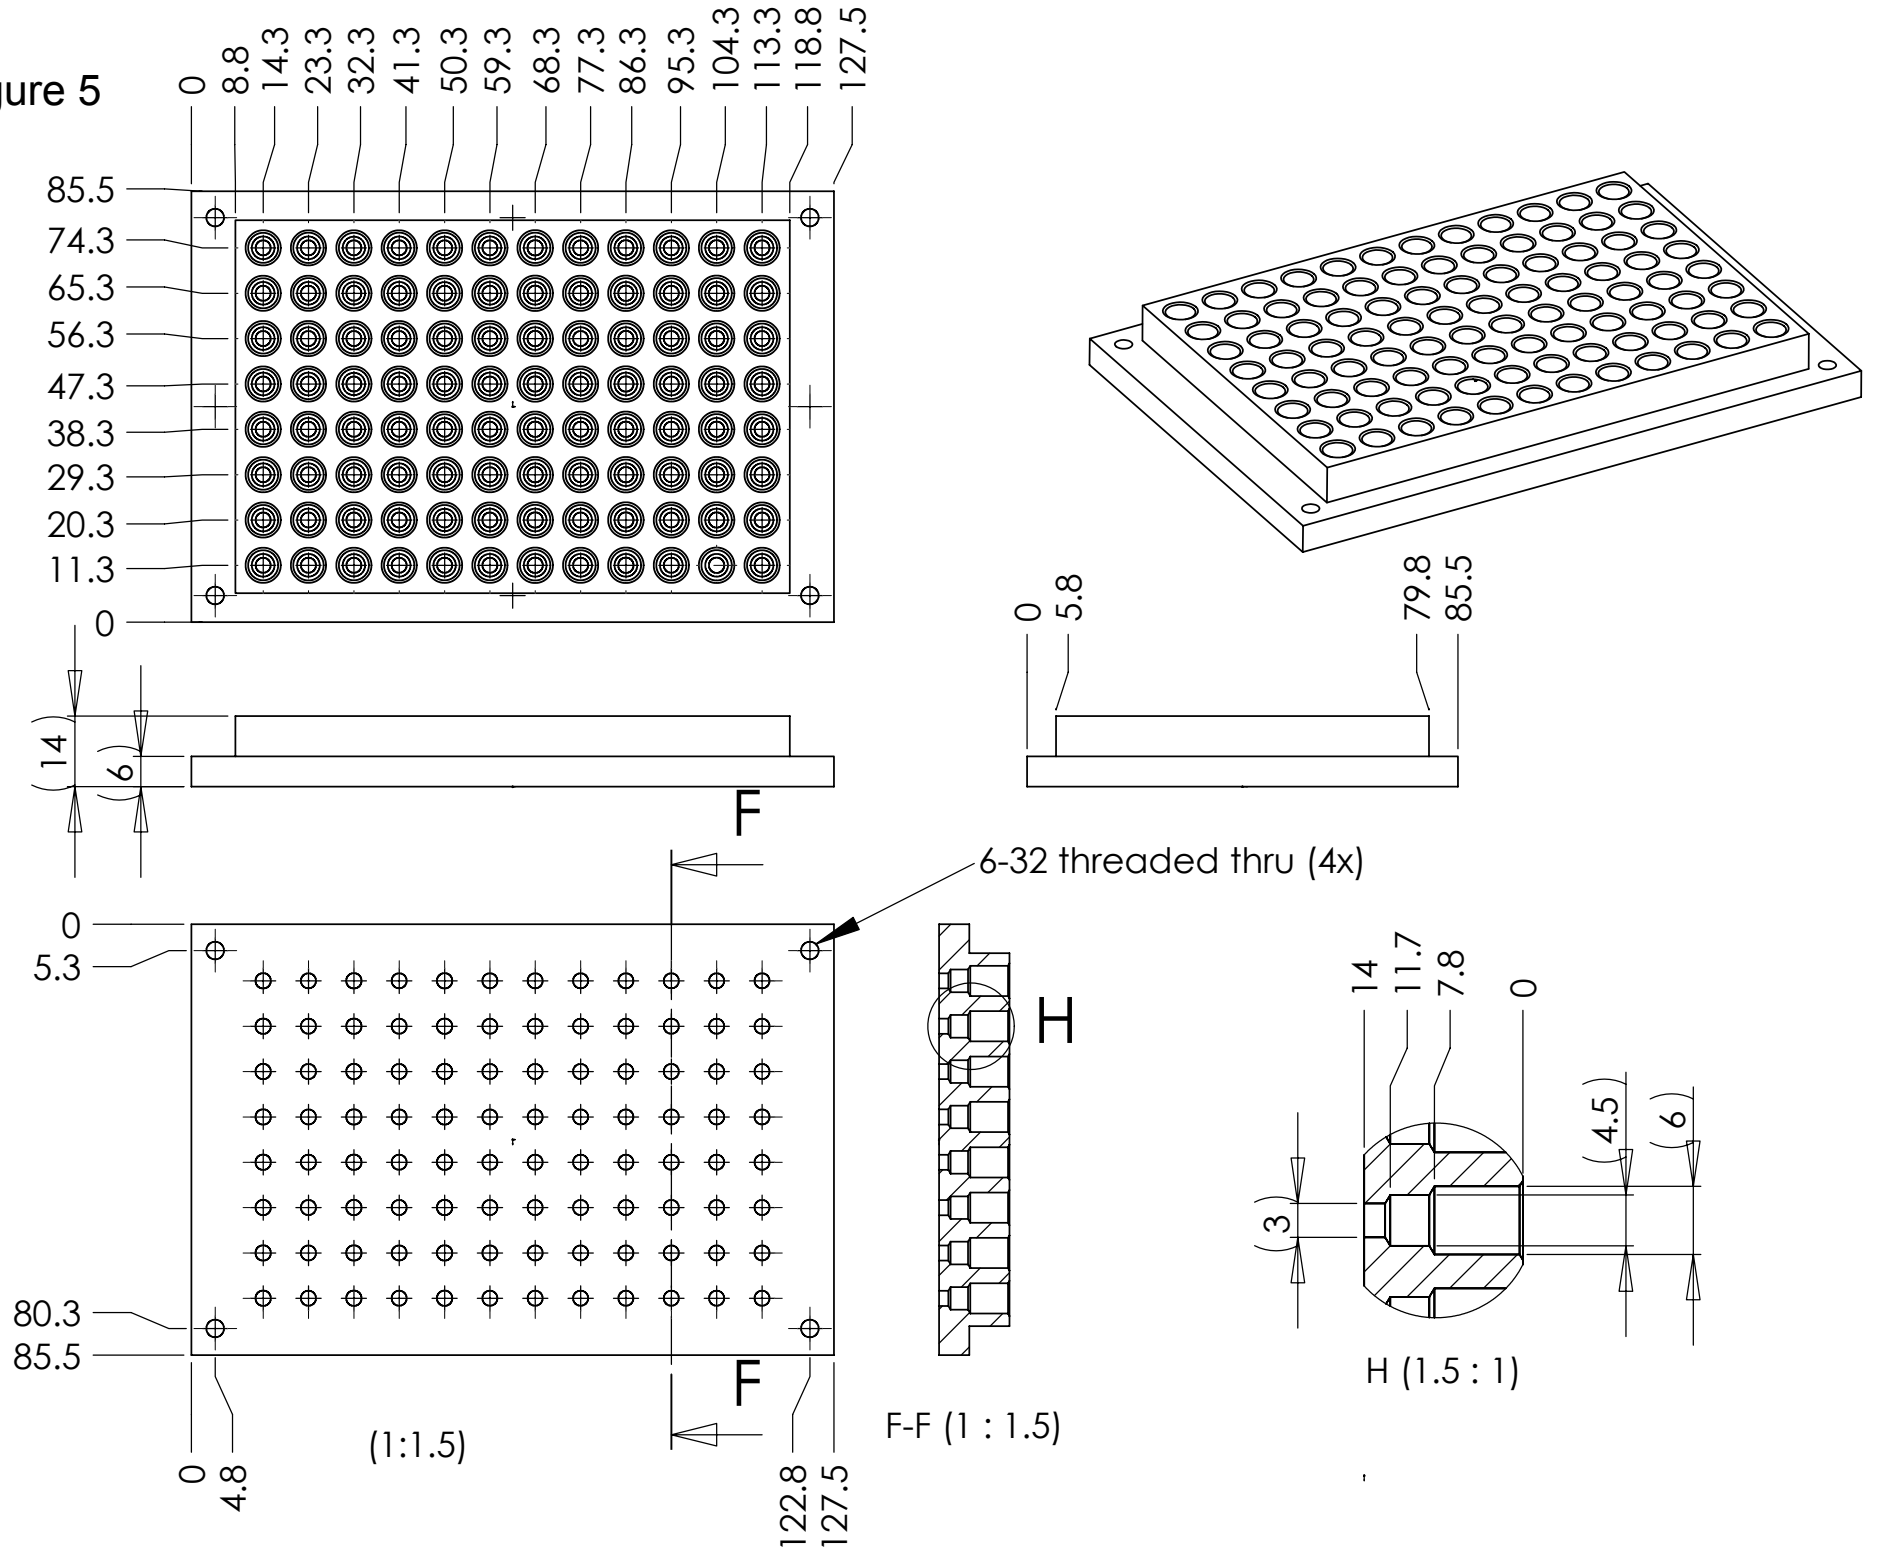

Figure 5

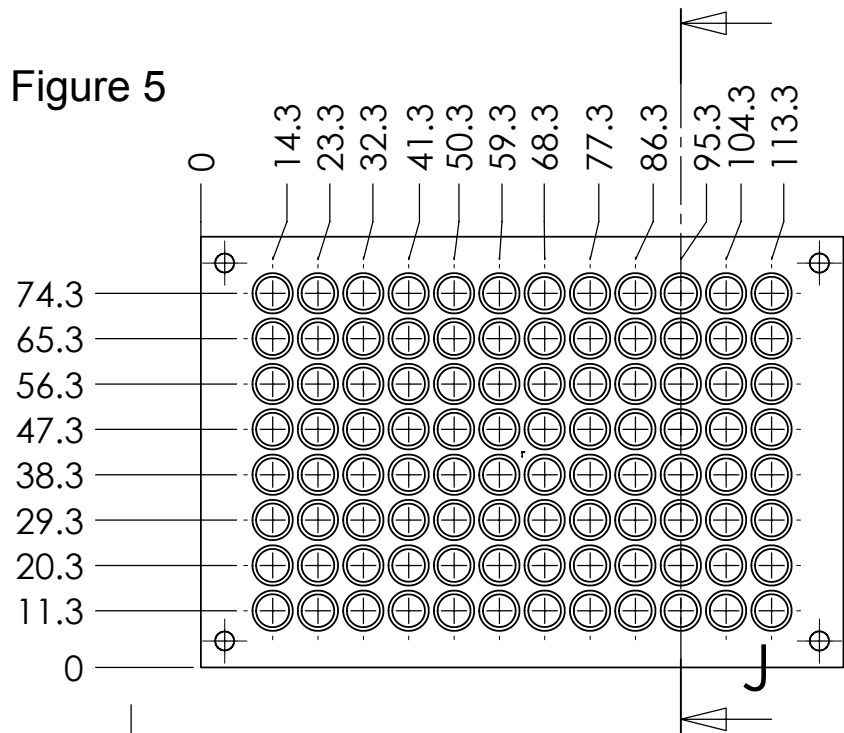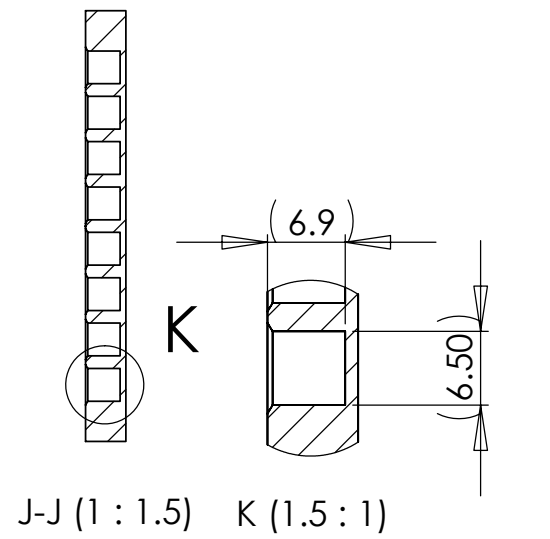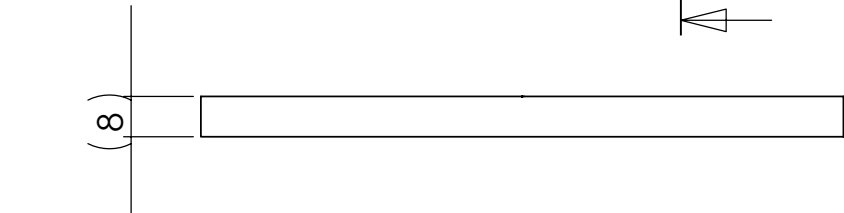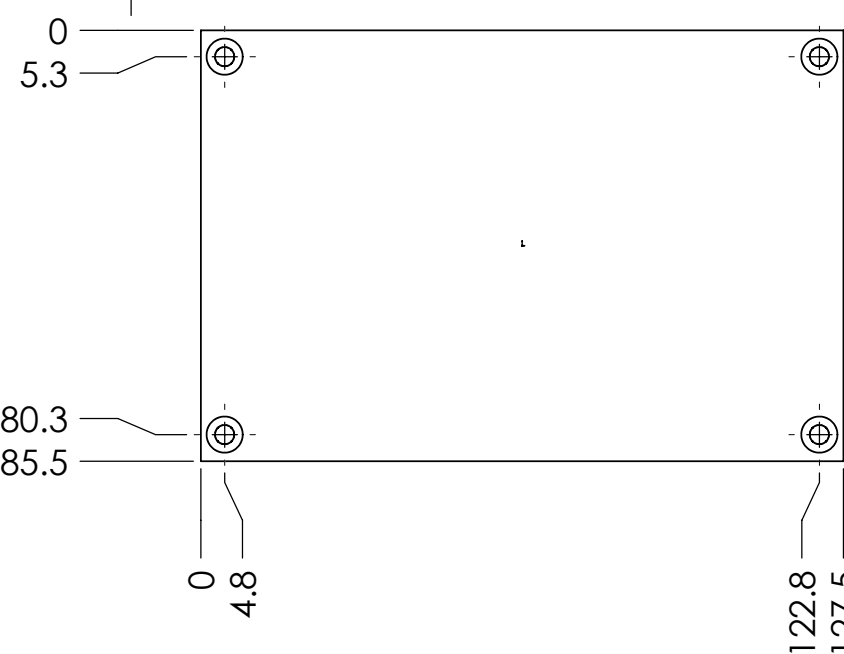

C Bore for 6-32 hex socket head cap screws  
 This hole should be matched with stainless steel screws such that when attached to mating piece (REL004-01) the ends of the screws do not protrude.  
 (4x)

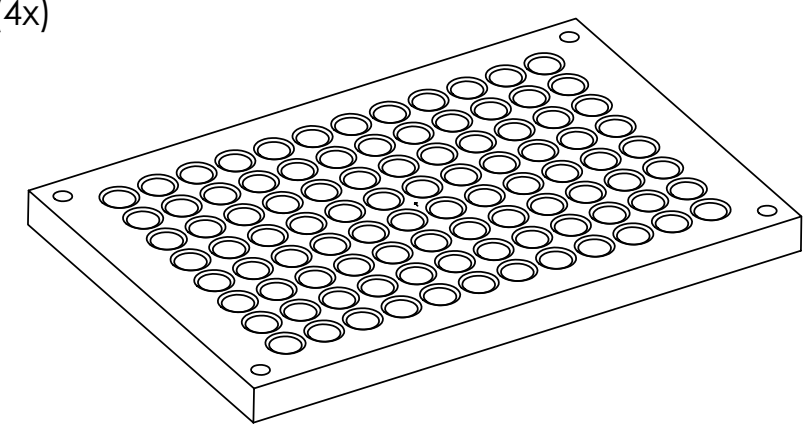

Supplement: NIHMS135642-supplement-Magnetic_plates_4.pdf [file NIHMS135642-supplement-Magnetic_plates_4.pdf]
