# Supplementary material
Source: PubMed Central journal article supplement (PMC2760592)

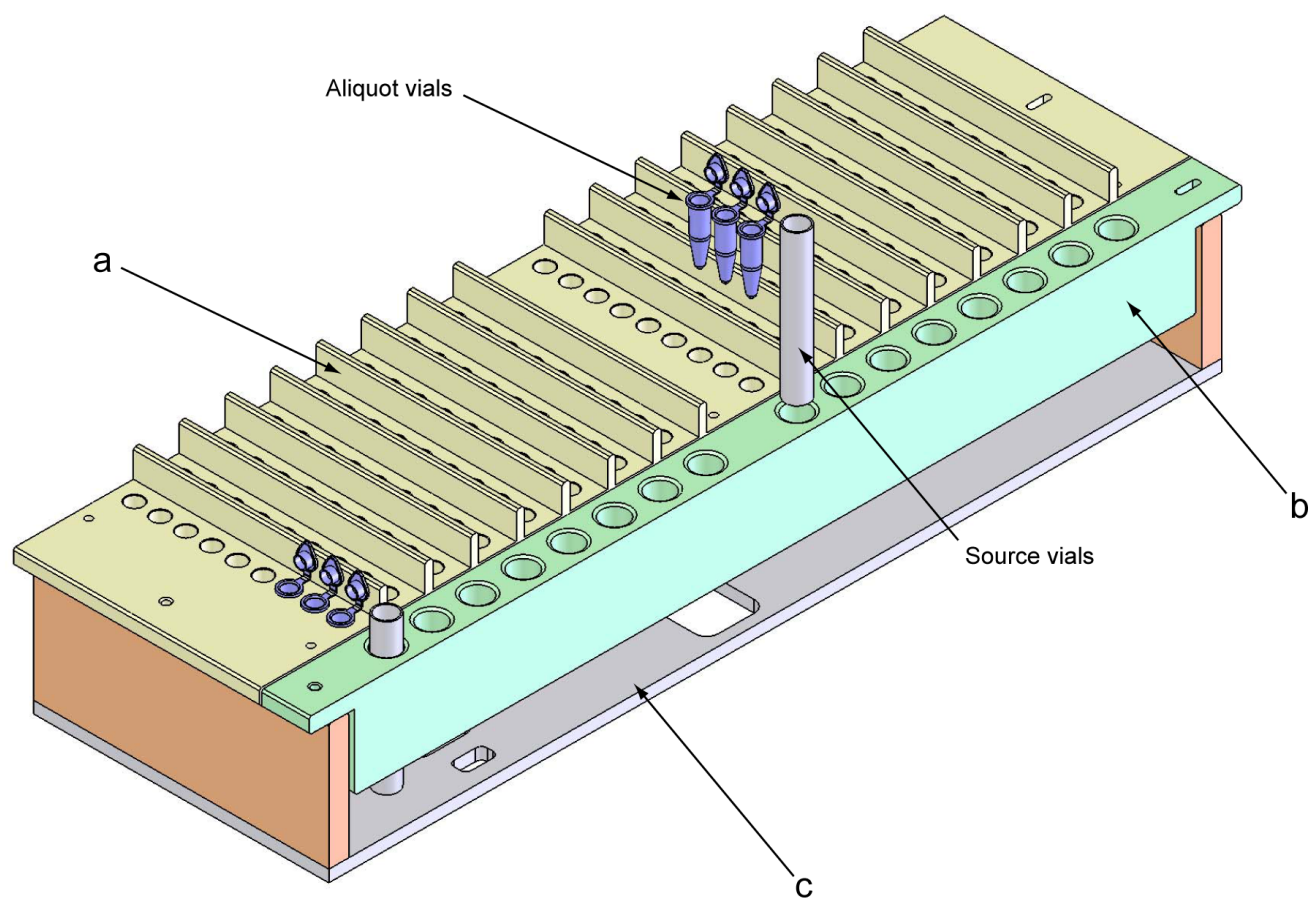

Supplement: NIHMS135642-supplement-Aliquoting_rack_1.pdf [file NIHMS135642-supplement-Aliquoting_rack_1.pdf]

A

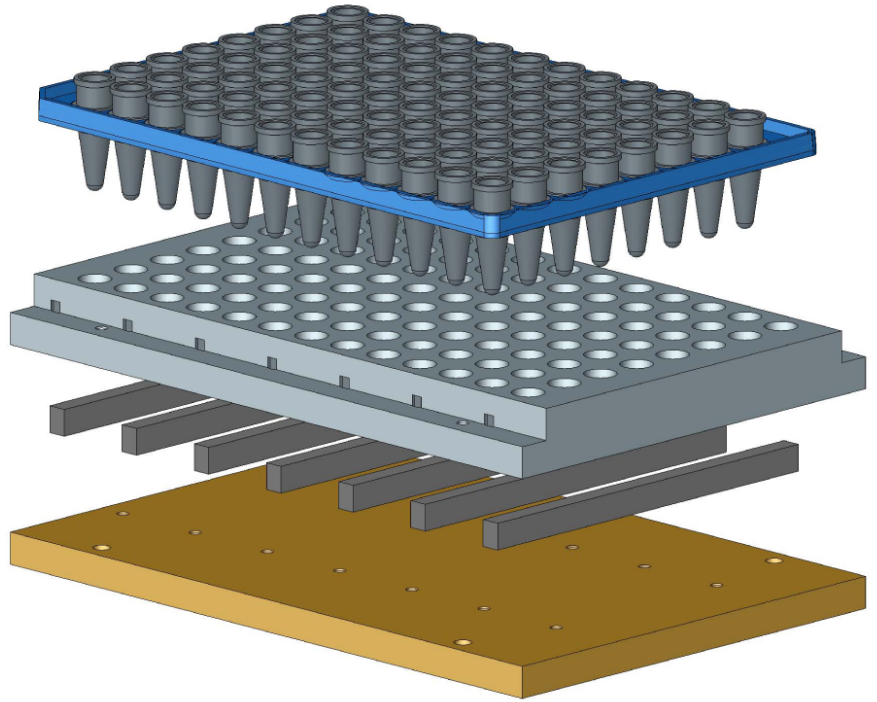

B

Top part

Bottom part

Side view

Side view

Top view

Bottom view

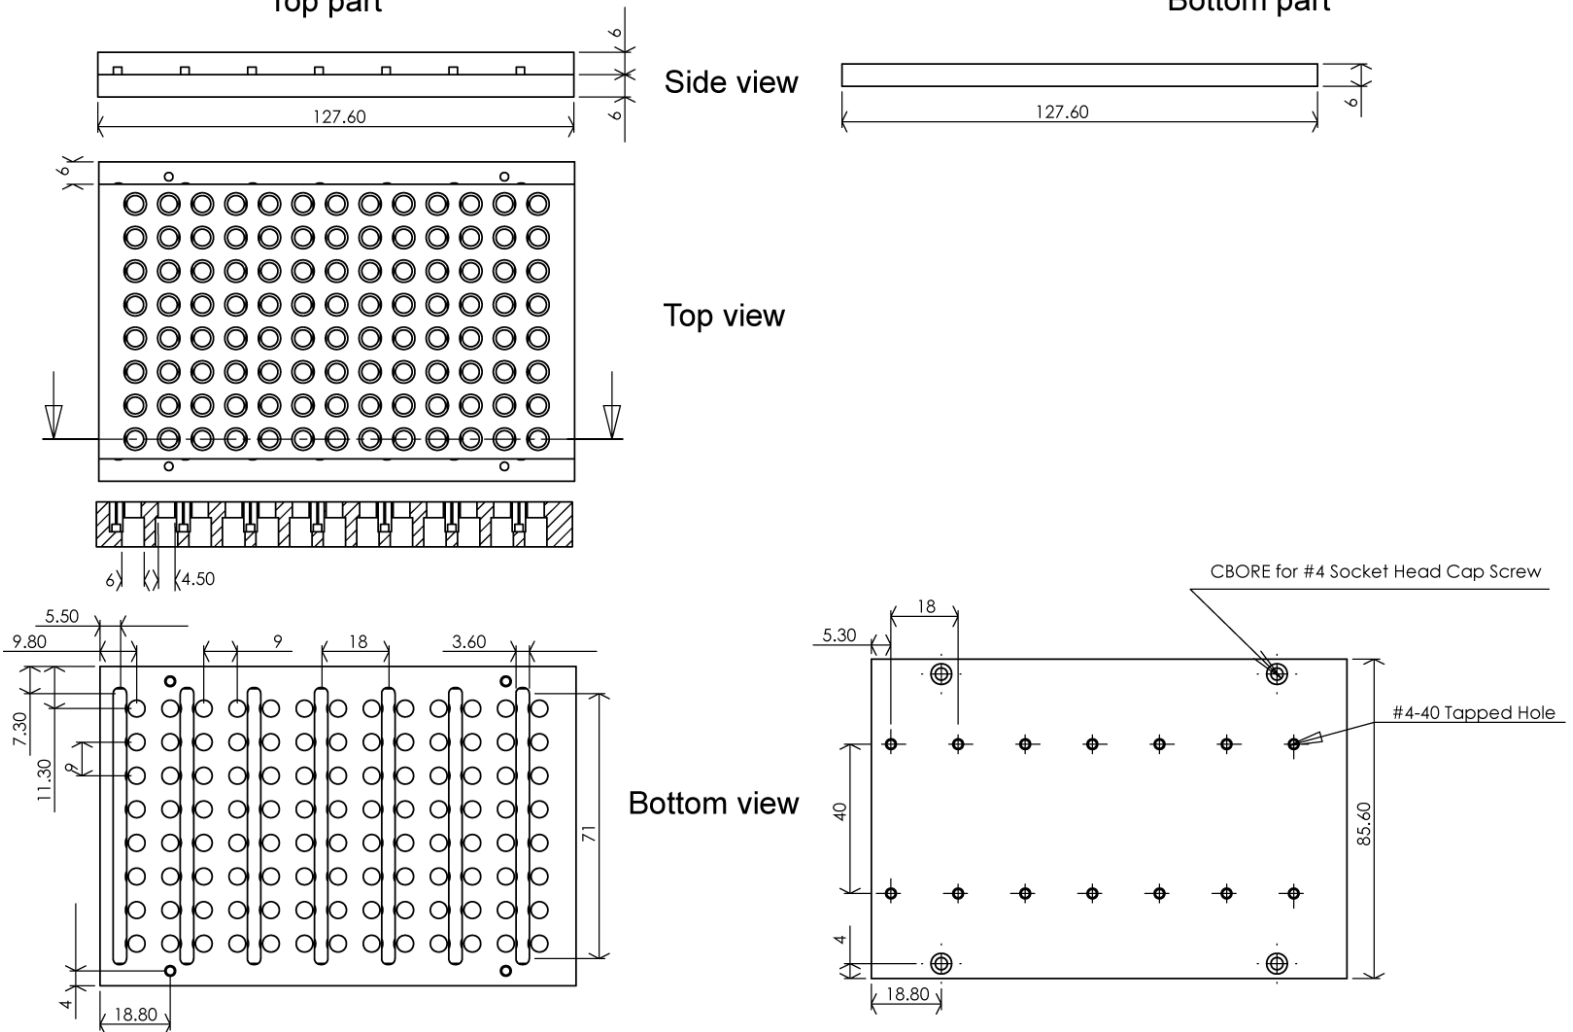

Supplement: NIHMS135642-supplement-Magnetic_plates_1.pdf [file NIHMS135642-supplement-Magnetic_plates_1.pdf]

Figure 4

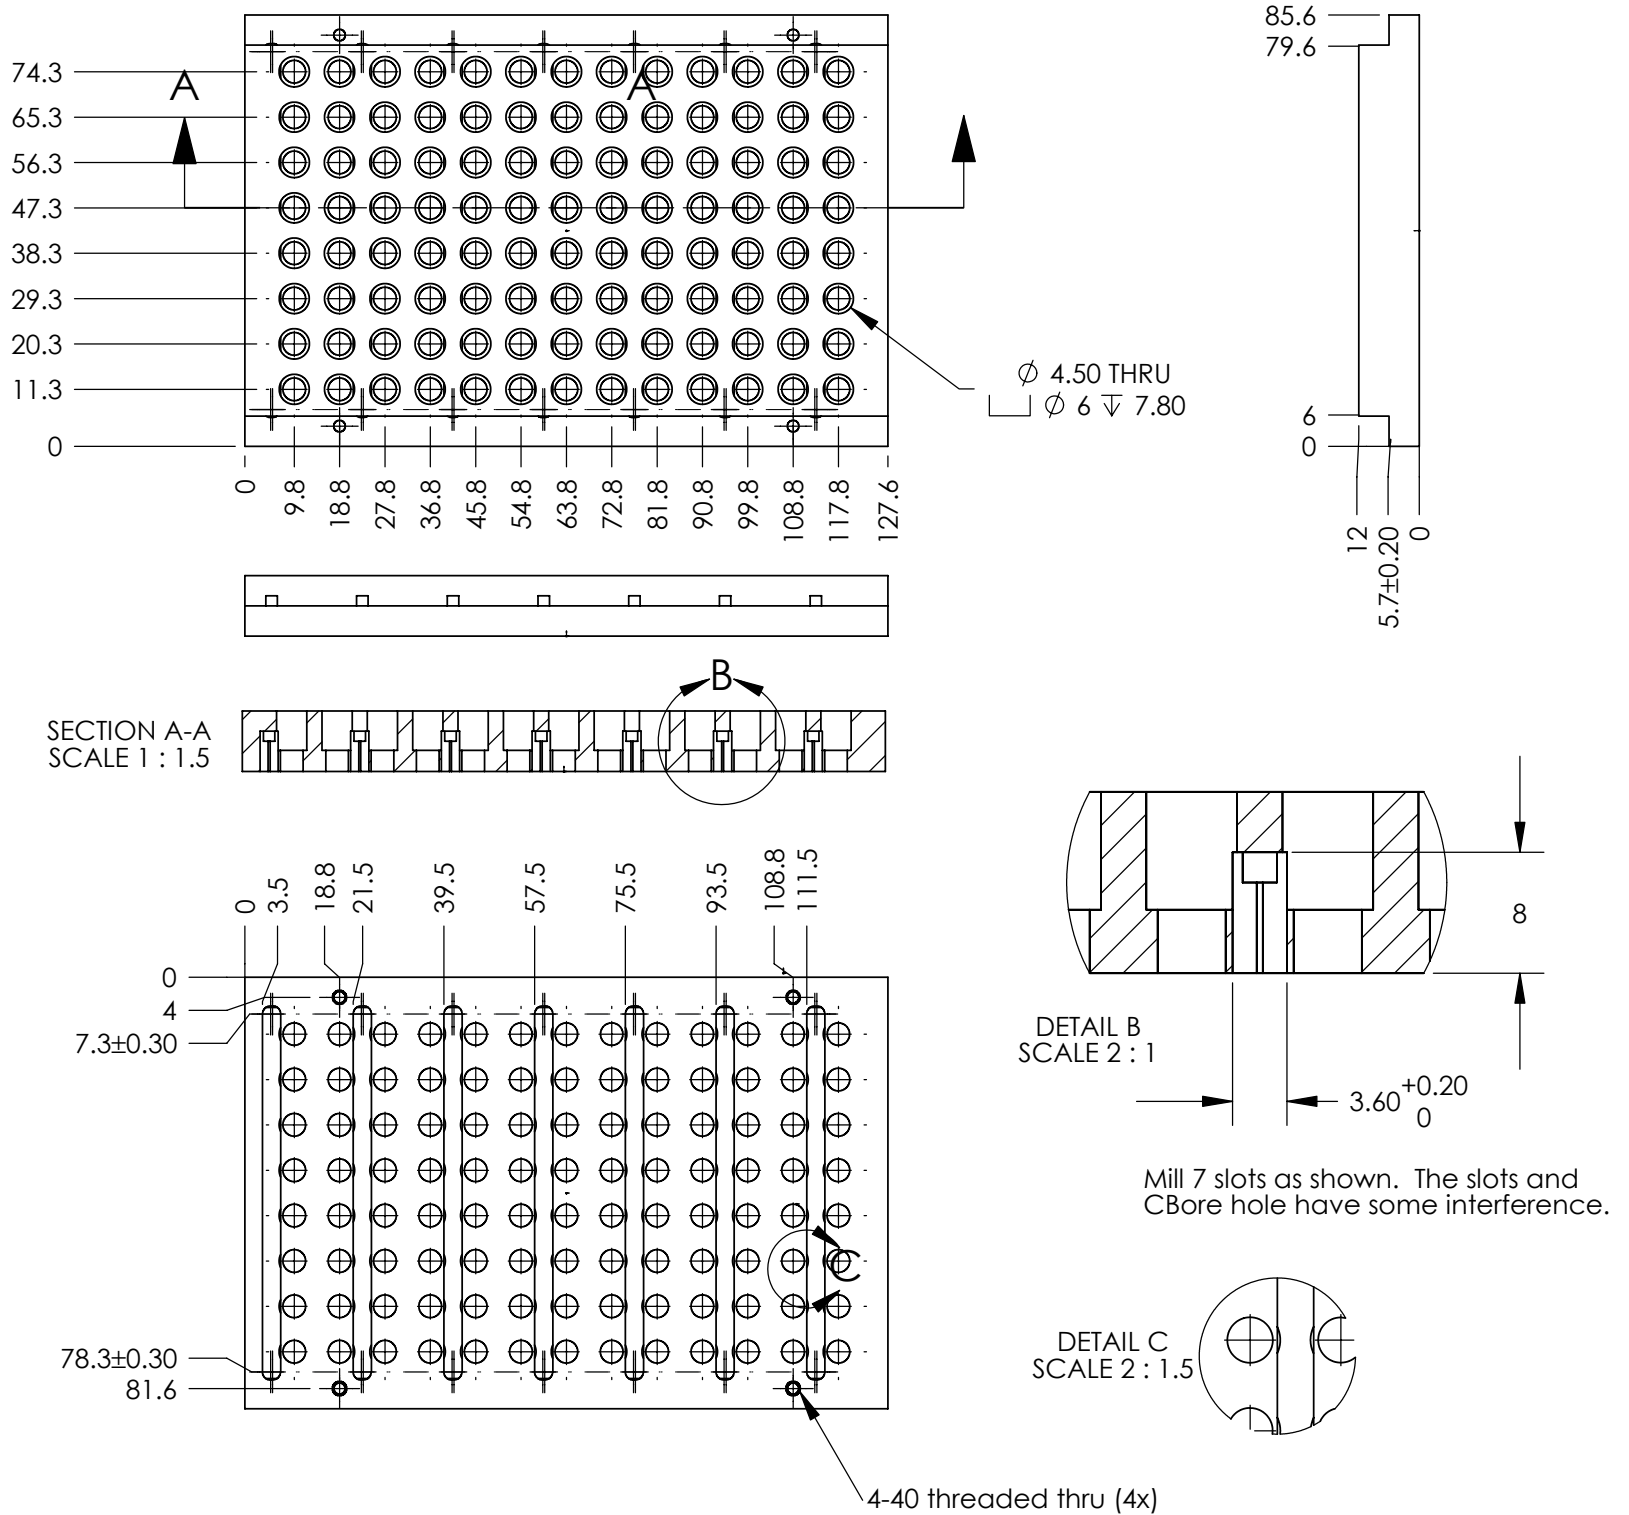

Figure 4

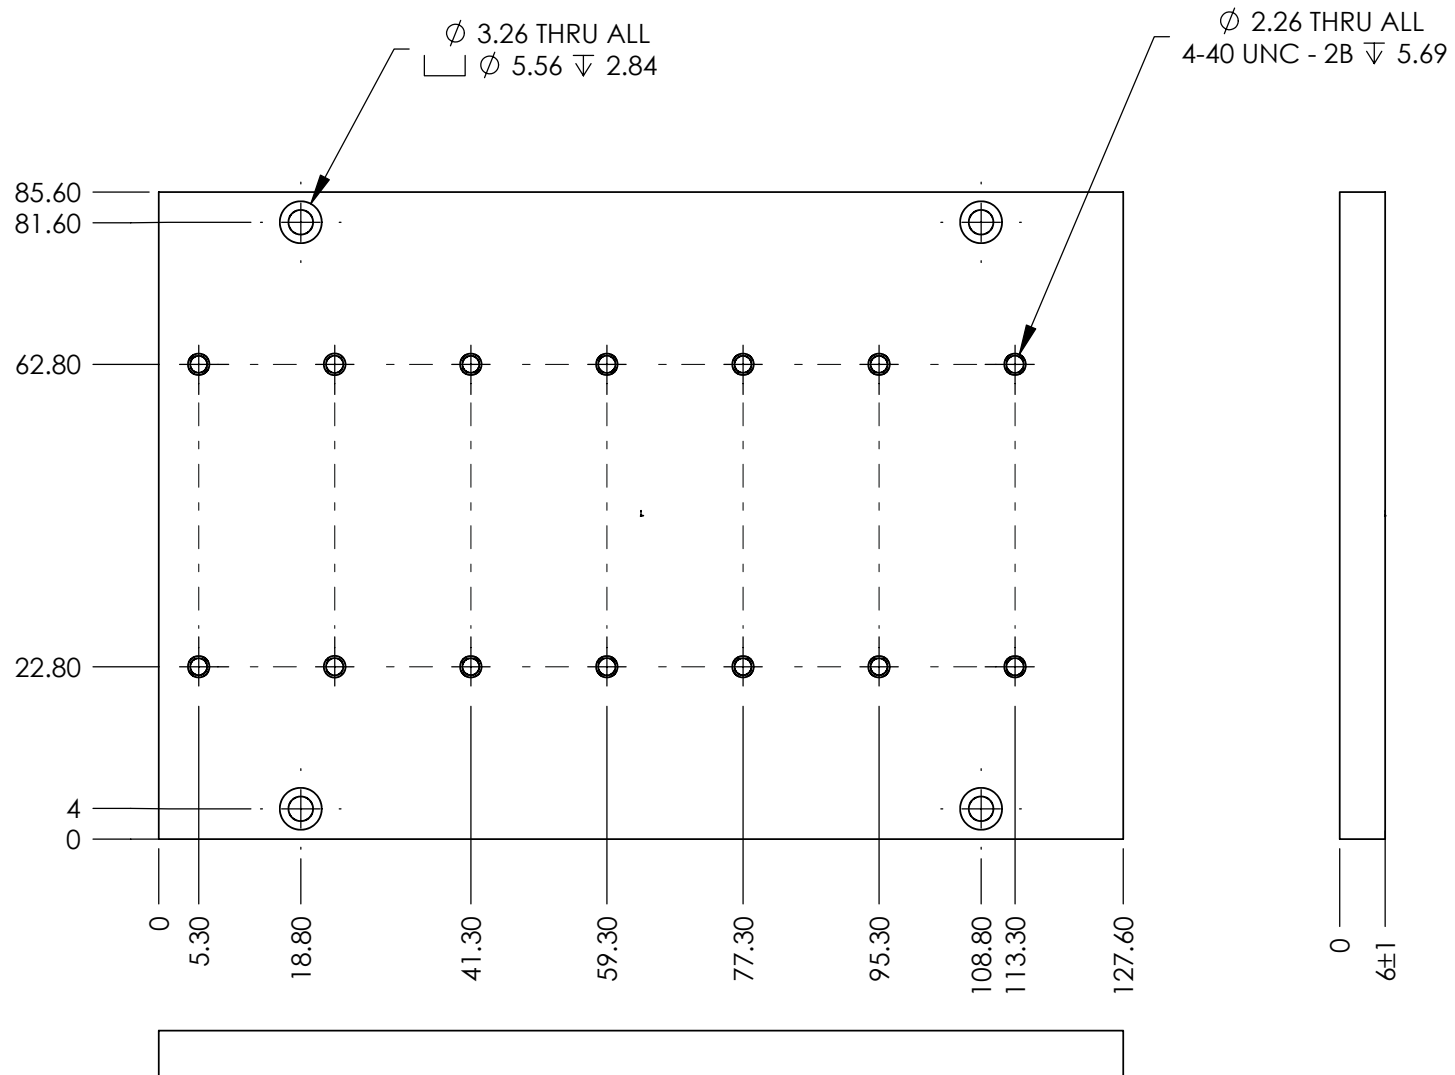

Figure 4

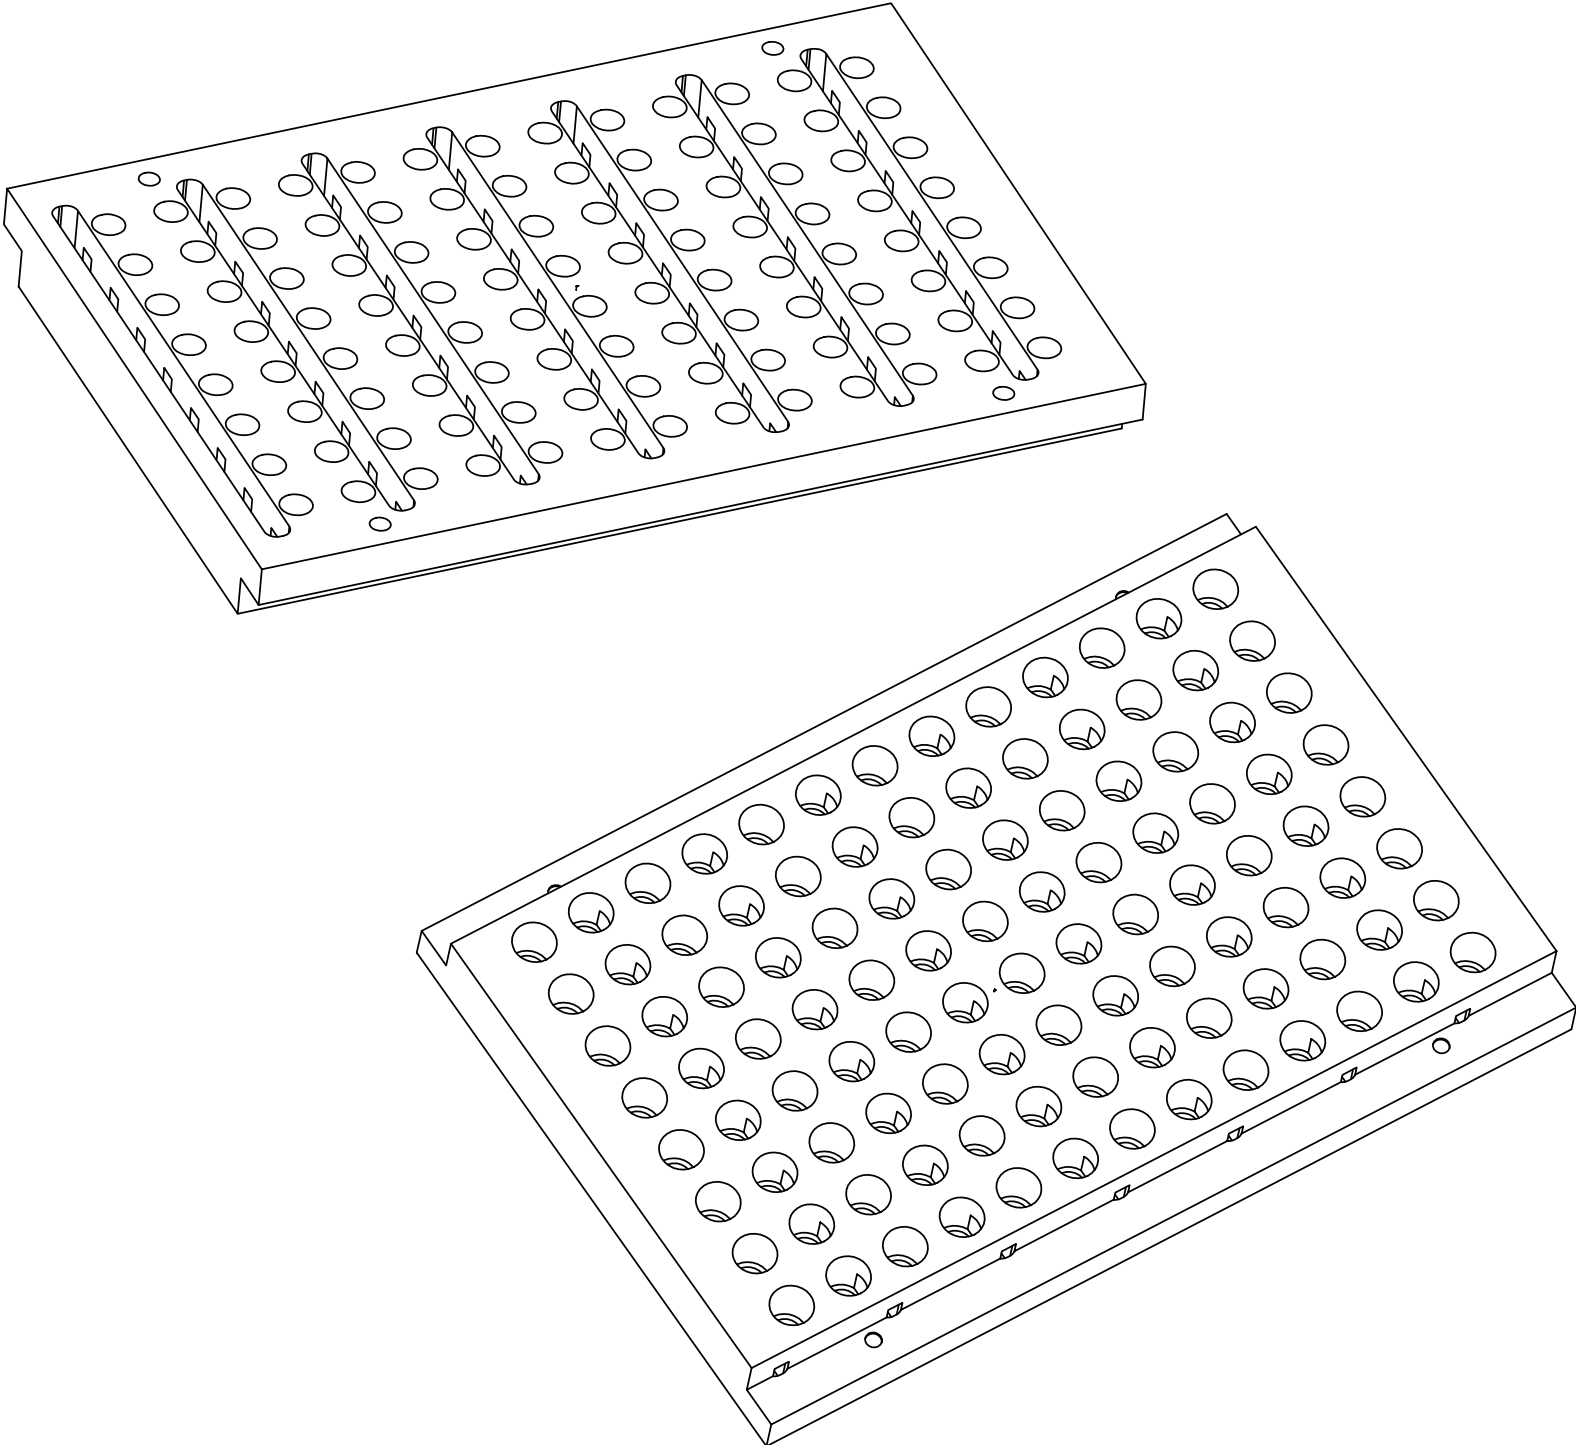

Supplement: NIHMS135642-supplement-Magnetic_plates_2.pdf [file NIHMS135642-supplement-Magnetic_plates_2.pdf]

A

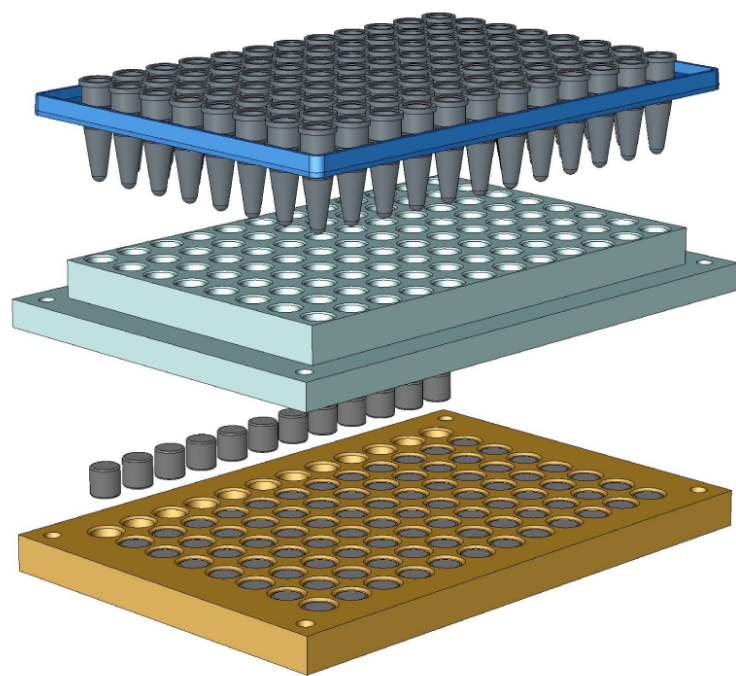

B

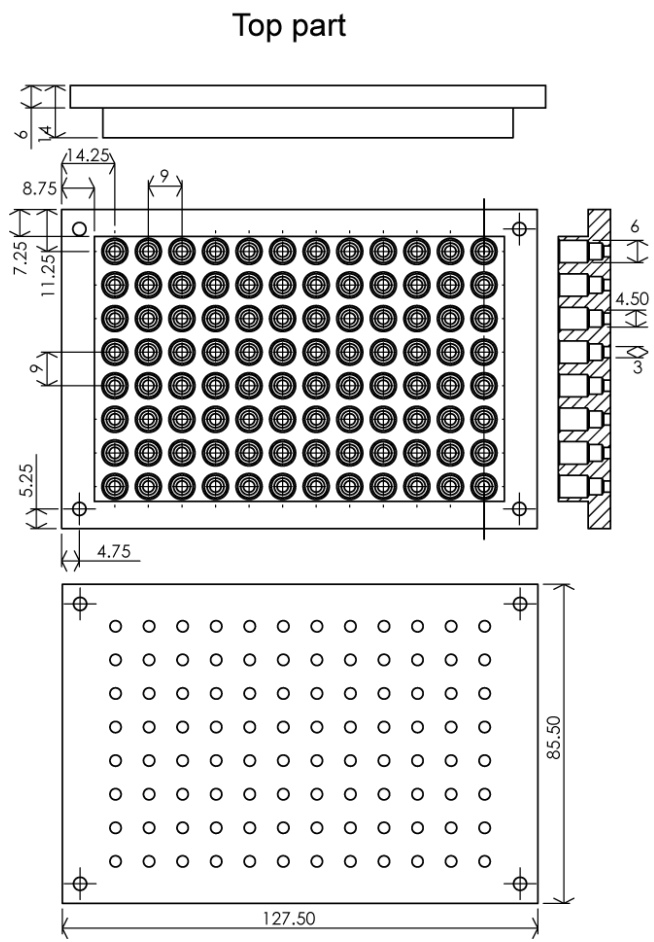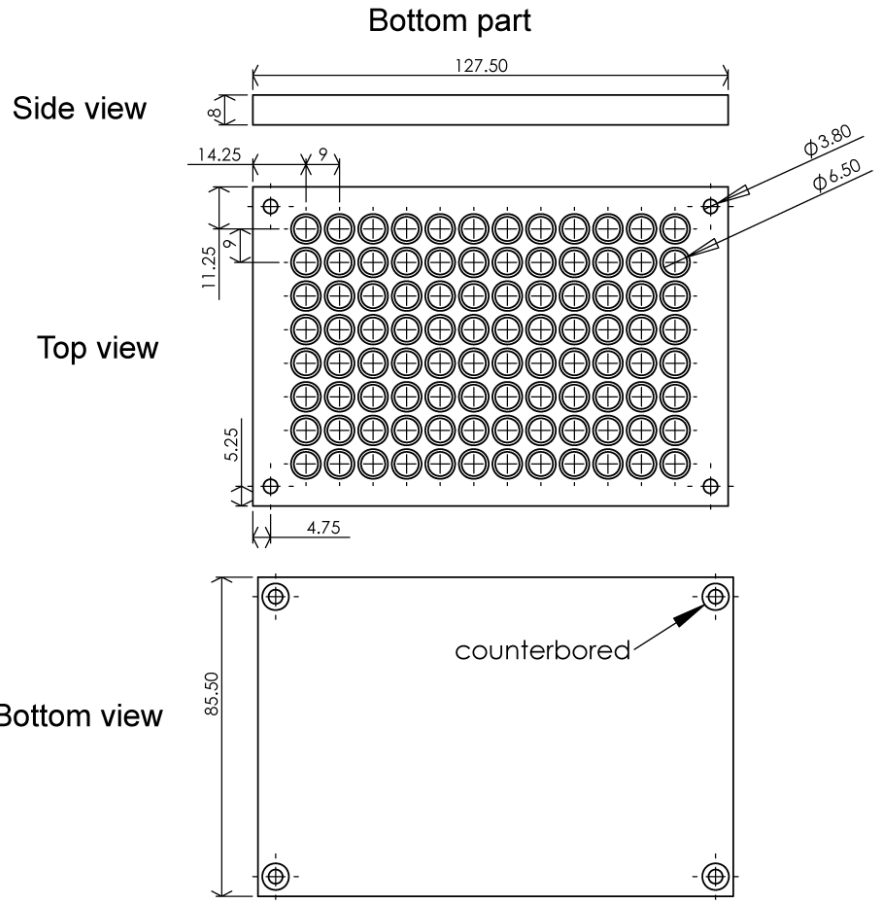

Supplement: NIHMS135642-supplement-Magnetic_plates_3.pdf [file NIHMS135642-supplement-Magnetic_plates_3.pdf]
